# Supplementary material
Source: PubMed Central journal article supplement (PMC2075142)
Supplement: jphysiol_2006.123463v2_1.pdf [file jphysiol_2006.123463v2_1.pdf]

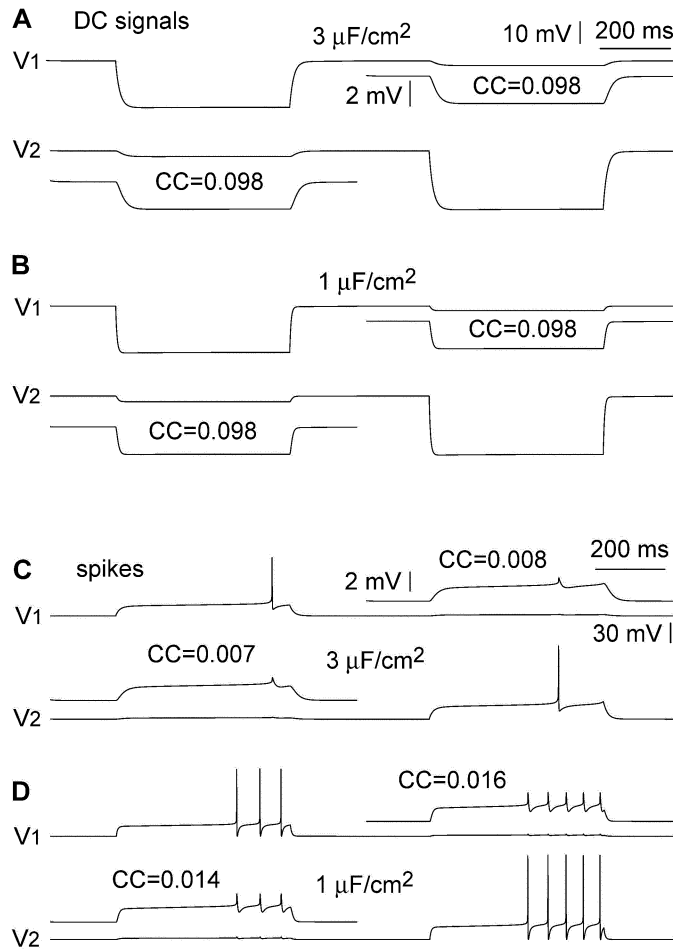

**Supplemental Figure 1:** Comparison of the responses of the model network when different specific capacitance values are implemented. Propagation of DC signals and spikes between model cells connected by a junctional conductance (0.5 nS) between the soma of cell 1, ( $V_1$ ) and mid-dendrite of cell 2 ( $V_2$ ). **(A)** Simulations were run using a high value ( $3 \mu\text{F}/\text{cm}^2$ ) of specific capacitance in order to compensate for the simplified structure of the model cells. Traces illustrate the propagation of DC signals generated by the sequential injection of a current step ( $-100 \text{ pA}$ ,  $500 \text{ ms}$ ) in cell 1 and cell 2, respectively. Insets show the responses in the non injected cells at magnified scale. DC coupling coefficients (CC) are shown above the response in the non-injected cells. Notice that repeating the simulation using a more traditional value of specific capacitance ( $1 \mu\text{F}/\text{cm}^2$ ) does not affect significantly the propagation of DC signals in the model, as shown in panel **(B)**. In contrast, propagation of spikes is depressed when using higher values of specific capacitance as shown by the comparison of the simulations run in panel **(C)** ( $3 \mu\text{F}/\text{cm}^2$ ) and **(D)** ( $1 \mu\text{F}/\text{cm}^2$ ). Spikes were evoked in the model cells by the sequential injection in cell 1 and 2 of a depolarizing current step ( $70 \text{ pA}$ ,  $500 \text{ ms}$ ). The propagation obtained by implementing higher capacitance values are more conservative and result in a better match to experimentally determined values [see Price et al., 2005 (average DC CC reported was  $0.094 \pm 0.056$ ) and Zsiros and Maccaferri, 2005 (reported spike CC was  $0.005 \pm 0.001$ )]
